# Supplementary material for: Ultra-Processed Food Consumption Associated with Overweight/Obesity among Chinese Adults—Results from China Health and Nutrition Survey 1997–2011
Source: MDPI journal article supplement (doi:10.3390/nu13082796), 2021-08-15

**Figure S1.** Sample flow chart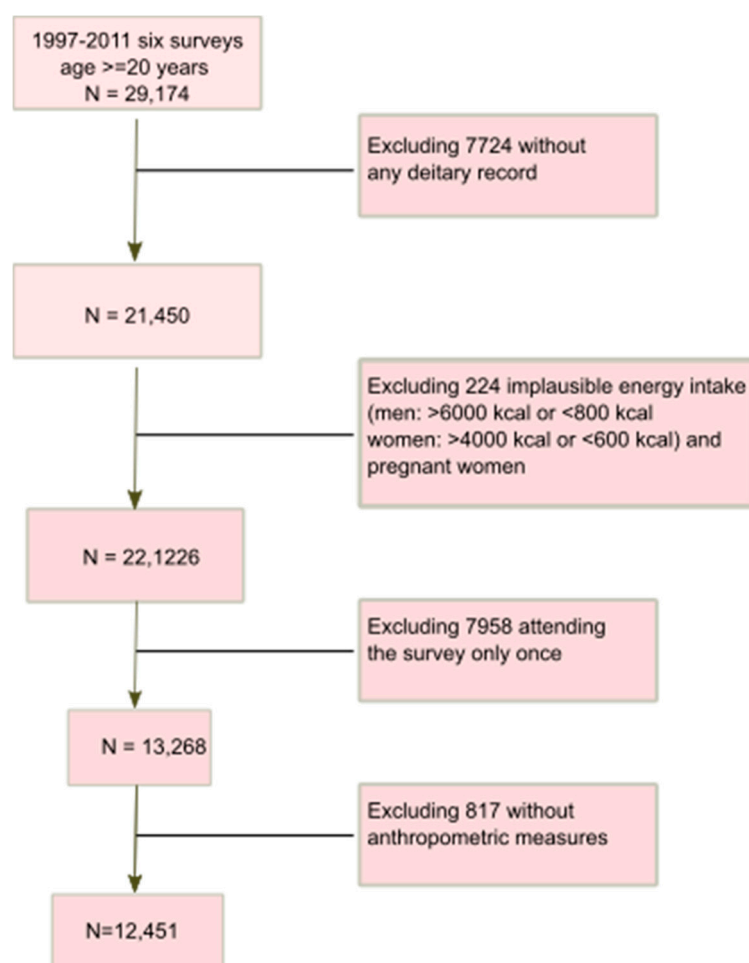

**Figure S2.** Age- and sex-adjusted proportion of UPF intake (g/day) by urbanization levels during 1997-2011 among adults attending China Health and Nutrition Survey

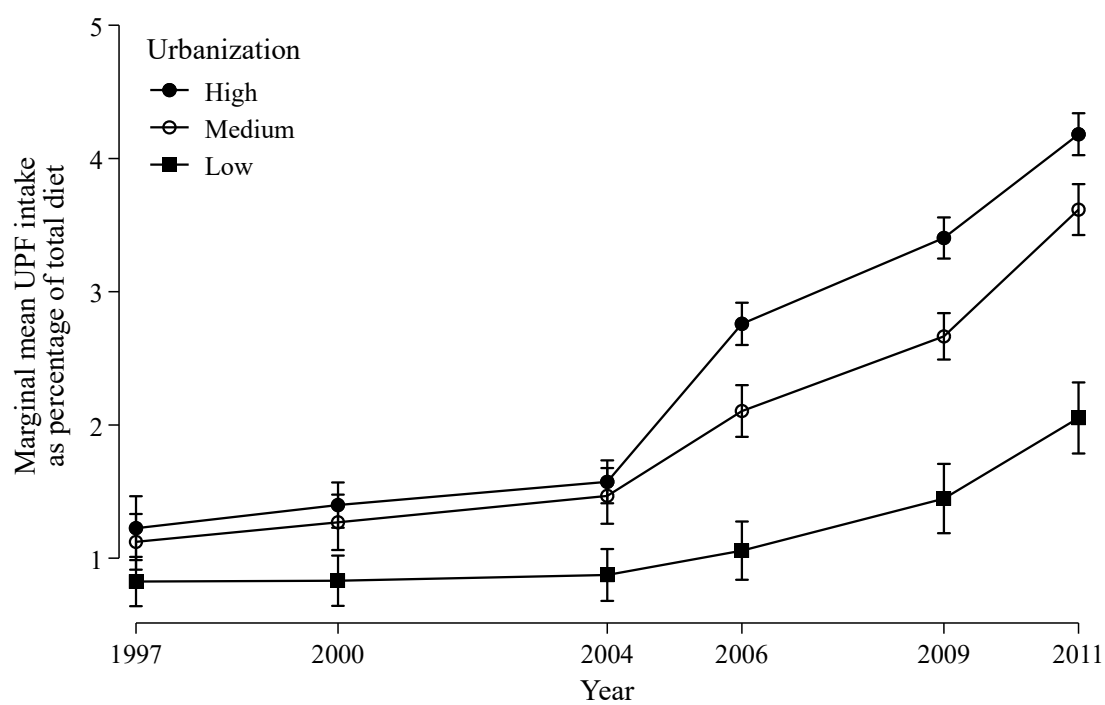

Supplement: s1 [file s1]
